# Supplementary material
Source: MDPI journal article supplement (https://www.mdpi.com/2078-2489/13/4/178)
Supplement: s1 [file s1]

## Part SM1: Factor Analysis (Blogging)

**Descriptive Statistics**

|      | Mean | Std.<br>Deviation | Analysis N | Missing N |
|------|------|-------------------|------------|-----------|
| BSI1 | 3.29 | .939              | 129        | 0         |
| BSI2 | 3.30 | .889              | 129        | 0         |
| BSI3 | 3.58 | .817              | 129        | 0         |
| BSI4 | 3.36 | 1.006             | 129        | 0         |
| BHM1 | 3.95 | .699              | 129        | 0         |
| BHM2 | 3.91 | .718              | 129        | 0         |
| BHM3 | 3.69 | .873              | 129        | 0         |
| BPV1 | 3.68 | .884              | 129        | 0         |
| BPV2 | 3.76 | .778              | 129        | 0         |
| BPV3 | 3.75 | .740              | 129        | 0         |
| BH1  | 3.23 | 1.042             | 129        | 0         |
| BH2  | 2.51 | 1.047             | 129        | 0         |
| BH3  | 3.19 | 1.029             | 129        | 0         |

**Correlation Matrix<sup>a</sup>**

|                 |      | BSI1  | BSI2  | BSI3  | BSI4  | BHM1  | BHM2  | BHM3  | BPV1  |
|-----------------|------|-------|-------|-------|-------|-------|-------|-------|-------|
| Correlation     | BSI1 | 1.000 | .697  | .295  | .368  | .215  | .223  | .198  | .302  |
|                 | BSI2 | .697  | 1.000 | .305  | .376  | .140  | .236  | .162  | .223  |
|                 | BSI3 | .295  | .305  | 1.000 | .250  | .247  | .272  | .299  | .280  |
|                 | BSI4 | .368  | .376  | .250  | 1.000 | .205  | .269  | .189  | .199  |
|                 | BHM1 | .215  | .140  | .247  | .205  | 1.000 | .799  | .663  | .111  |
|                 | BHM2 | .223  | .236  | .272  | .269  | .799  | 1.000 | .779  | .215  |
|                 | BHM3 | .198  | .162  | .299  | .189  | .663  | .779  | 1.000 | .175  |
|                 | BPV1 | .302  | .223  | .280  | .199  | .111  | .215  | .175  | 1.000 |
|                 | BPV2 | .098  | .015  | .283  | .310  | .191  | .256  | .257  | .592  |
|                 | BPV3 | .196  | .091  | .292  | .256  | .170  | .224  | .194  | .619  |
|                 | BH1  | .249  | .151  | .271  | .256  | .414  | .392  | .389  | .259  |
|                 | BH2  | .354  | .277  | .371  | .285  | .294  | .245  | .312  | .152  |
|                 | BH3  | .226  | .177  | .335  | .313  | .459  | .476  | .386  | .237  |
| Sig. (1-tailed) | BSI1 |       | .000  | .000  | .000  | .007  | .006  | .012  | .000  |
|                 | BSI2 | .000  |       | .000  | .000  | .057  | .004  | .033  | .006  |
|                 | BSI3 | .000  | .000  |       | .002  | .002  | .001  | .000  | .001  |
|                 | BSI4 | .000  | .000  | .002  |       | .010  | .001  | .016  | .012  |
|                 | BHM1 | .007  | .057  | .002  | .010  |       | .000  | .000  | .105  |
|                 | BHM2 | .006  | .004  | .001  | .001  | .000  |       | .000  | .007  |
|                 | BHM3 | .012  | .033  | .000  | .016  | .000  | .000  |       | .024  |

|      |      |      |      |      |      |      |      |      |
|------|------|------|------|------|------|------|------|------|
| BPV1 | .000 | .006 | .001 | .012 | .105 | .007 | .024 |      |
| BPV2 | .136 | .431 | .001 | .000 | .015 | .002 | .002 | .000 |
| BPV3 | .013 | .152 | .000 | .002 | .027 | .005 | .014 | .000 |
| BH1  | .002 | .044 | .001 | .002 | .000 | .000 | .000 | .002 |
| BH2  | .000 | .001 | .000 | .001 | .000 | .003 | .000 | .043 |
| BH3  | .005 | .022 | .000 | .000 | .000 | .000 | .000 | .003 |

**Correlation Matrix<sup>a</sup>**

|                 |      | BPV2  | BPV3  | BH1   | BH2   | BH3   |
|-----------------|------|-------|-------|-------|-------|-------|
| Correlation     | BSI1 | .098  | .196  | .249  | .354  | .226  |
|                 | BSI2 | .015  | .091  | .151  | .277  | .177  |
|                 | BSI3 | .283  | .292  | .271  | .371  | .335  |
|                 | BSI4 | .310  | .256  | .256  | .285  | .313  |
|                 | BHM1 | .191  | .170  | .414  | .294  | .459  |
|                 | BHM2 | .256  | .224  | .392  | .245  | .476  |
|                 | BHM3 | .257  | .194  | .389  | .312  | .386  |
|                 | BPV1 | .592  | .619  | .259  | .152  | .237  |
|                 | BPV2 | 1.000 | .723  | .368  | .143  | .349  |
|                 | BPV3 | .723  | 1.000 | .278  | .175  | .328  |
|                 | BH1  | .368  | .278  | 1.000 | .649  | .746  |
|                 | BH2  | .143  | .175  | .649  | 1.000 | .593  |
|                 | BH3  | .349  | .328  | .746  | .593  | 1.000 |
| Sig. (1-tailed) | BSI1 | .136  | .013  | .002  | .000  | .005  |
|                 | BSI2 | .431  | .152  | .044  | .001  | .022  |
|                 | BSI3 | .001  | .000  | .001  | .000  | .000  |
|                 | BSI4 | .000  | .002  | .002  | .001  | .000  |
|                 | BHM1 | .015  | .027  | .000  | .000  | .000  |
|                 | BHM2 | .002  | .005  | .000  | .003  | .000  |
|                 | BHM3 | .002  | .014  | .000  | .000  | .000  |
|                 | BPV1 | .000  | .000  | .002  | .043  | .003  |
|                 | BPV2 |       | .000  | .000  | .054  | .000  |
|                 | BPV3 | .000  |       | .001  | .023  | .000  |
|                 | BH1  | .000  | .001  |       | .000  | .000  |
|                 | BH2  | .054  | .023  | .000  |       | .000  |
|                 | BH3  | .000  | .000  | .000  | .000  |       |

a. Determinant = .001

**Inverse of Correlation Matrix**

|      | BSI1   | BSI2   | BSI3  | BSI4  | BHM1   | BHM2   | BHM3   | BPV1  | BPV2   | BPV3   |
|------|--------|--------|-------|-------|--------|--------|--------|-------|--------|--------|
| BSI1 | 2.251  | -1.345 | -.011 | -.221 | -.385  | .363   | -.106  | -.345 | .262   | -.198  |
| BSI2 | -1.345 | 2.223  | -.256 | -.319 | .412   | -.621  | .167   | -.157 | .263   | .144   |
| BSI3 | -.011  | -.256  | 1.376 | -.015 | -.080  | .093   | -.213  | -.094 | -.184  | -.091  |
| BSI4 | -.221  | -.319  | -.015 | 1.413 | .065   | -.287  | .169   | .197  | -.475  | .006   |
| BHM1 | -.385  | .412   | -.080 | .065  | 3.058  | -2.223 | -.170  | .304  | .063   | -.062  |
| BHM2 | .363   | -.621  | .093  | -.287 | -2.223 | 4.707  | -2.064 | -.372 | .147   | -.018  |
| BHM3 | -.106  | .167   | -.213 | .169  | -.170  | -2.064 | 2.830  | .124  | -.320  | .111   |
| BPV1 | -.345  | -.157  | -.094 | .197  | .304   | -.372  | .124   | 1.966 | -.664  | -.683  |
| BPV2 | .262   | .263   | -.184 | -.475 | .063   | .147   | -.320  | -.664 | 2.755  | -1.357 |
| BPV3 | -.198  | .144   | -.091 | .006  | -.062  | -.018  | .111   | -.683 | -1.357 | 2.479  |
| BH1  | -.151  | .121   | .234  | .123  | -.237  | .142   | -.187  | -.149 | -.633  | .346   |
| BH2  | -.249  | -.093  | -.351 | -.184 | -.101  | .641   | -.420  | .034  | .457   | -.121  |
| BH3  | .163   | .000   | -.184 | -.155 | -.097  | -.780  | .415   | .145  | -.027  | -.322  |

**Inverse of Correlation Matrix**

|      | BH1    | BH2    | BH3    |
|------|--------|--------|--------|
| BSI1 | -.151  | -.249  | .163   |
| BSI2 | .121   | -.093  | .000   |
| BSI3 | .234   | -.351  | -.184  |
| BSI4 | .123   | -.184  | -.155  |
| BHM1 | -.237  | -.101  | -.097  |
| BHM2 | .142   | .641   | -.780  |
| BHM3 | -.187  | -.420  | .415   |
| BPV1 | -.149  | .034   | .145   |
| BPV2 | -.633  | .457   | -.027  |
| BPV3 | .346   | -.121  | -.322  |
| BH1  | 2.959  | -1.016 | -1.453 |
| BH2  | -1.016 | 2.231  | -.541  |
| BH3  | -1.453 | -.541  | 2.814  |

**KMO and Bartlett's Test**

|                                                  |                    |         |
|--------------------------------------------------|--------------------|---------|
| Kaiser-Meyer-Olkin Measure of Sampling Adequacy. |                    | .783    |
| Bartlett's Test of Sphericity                    | Approx. Chi-Square | 856.090 |
|                                                  | Df                 | 78      |
|                                                  | Sig.               | .000    |

**Anti-image Matrices**

|                        |      | BSI1              | BSI2              | BSI3              | BSI4              | BHM1              | BHM2              | BHM3              |
|------------------------|------|-------------------|-------------------|-------------------|-------------------|-------------------|-------------------|-------------------|
| Anti-image Covariance  | BSI1 | .444              | -.269             | -.004             | -.069             | -.056             | .034              | -.017             |
|                        | BSI2 | -.269             | .450              | -.084             | -.102             | .061              | -.059             | .027              |
|                        | BSI3 | -.004             | -.084             | .727              | -.008             | -.019             | .014              | -.055             |
|                        | BSI4 | -.069             | -.102             | -.008             | .708              | .015              | -.043             | .042              |
|                        | BHM1 | -.056             | .061              | -.019             | .015              | .327              | -.154             | -.020             |
|                        | BHM2 | .034              | -.059             | .014              | -.043             | -.154             | .212              | -.155             |
|                        | BHM3 | -.017             | .027              | -.055             | .042              | -.020             | -.155             | .353              |
|                        | BPV1 | -.078             | -.036             | -.035             | .071              | .051              | -.040             | .022              |
|                        | BPV2 | .042              | .043              | -.049             | -.122             | .008              | .011              | -.041             |
|                        | BPV3 | -.036             | .026              | -.027             | .002              | -.008             | -.002             | .016              |
|                        | BH1  | -.023             | .018              | .057              | .029              | -.026             | .010              | -.022             |
|                        | BH2  | -.050             | -.019             | -.114             | -.058             | -.015             | .061              | -.067             |
|                        | BH3  | .026              | -2.304E-6         | -.048             | -.039             | -.011             | -.059             | .052              |
| Anti-image Correlation | BSI1 | .719 <sup>a</sup> | -.601             | -.006             | -.124             | -.147             | .112              | -.042             |
|                        | BSI2 | -.601             | .667 <sup>a</sup> | -.146             | -.180             | .158              | -.192             | .067              |
|                        | BSI3 | -.006             | -.146             | .901 <sup>a</sup> | -.010             | -.039             | .037              | -.108             |
|                        | BSI4 | -.124             | -.180             | -.010             | .853 <sup>a</sup> | .031              | -.111             | .085              |
|                        | BHM1 | -.147             | .158              | -.039             | .031              | .810 <sup>a</sup> | -.586             | -.058             |
|                        | BHM2 | .112              | -.192             | .037              | -.111             | -.586             | .717 <sup>a</sup> | -.565             |
|                        | BHM3 | -.042             | .067              | -.108             | .085              | -.058             | -.565             | .808 <sup>a</sup> |
|                        | BPV1 | -.164             | -.075             | -.057             | .118              | .124              | -.122             | .052              |
|                        | BPV2 | .105              | .106              | -.095             | -.241             | .022              | .041              | -.115             |
|                        | BPV3 | -.084             | .061              | -.049             | .003              | -.023             | -.005             | .042              |
|                        | BH1  | -.059             | .047              | .116              | .060              | -.079             | .038              | -.065             |
|                        | BH2  | -.111             | -.042             | -.200             | -.103             | -.039             | .198              | -.167             |
|                        | BH3  | .065              | -5.763E-6         | -.094             | -.078             | -.033             | -.214             | .147              |

**Anti-image Matrices**

|                       |      | BPV1  | BPV2  | BPV3  | BH1   | BH2   | BH3          |
|-----------------------|------|-------|-------|-------|-------|-------|--------------|
| Anti-image Covariance | BSI1 | -.078 | .042  | -.036 | -.023 | -.050 | .026         |
|                       | BSI2 |       |       |       |       |       | -            |
|                       |      | -.036 | .043  | .026  | .018  | -.019 | 2.304<br>E-6 |
|                       | BSI3 | -.035 | -.049 | -.027 | .057  | -.114 | -.048        |
|                       | BSI4 | .071  | -.122 | .002  | .029  | -.058 | -.039        |
|                       | BHM1 | .051  | .008  | -.008 | -.026 | -.015 | -.011        |
|                       | BHM2 | -.040 | .011  | -.002 | .010  | .061  | -.059        |

|                        |      |                   |                   |                   |                   |                   |                   |
|------------------------|------|-------------------|-------------------|-------------------|-------------------|-------------------|-------------------|
|                        | BHM3 | .022              | -.041             | .016              | -.022             | -.067             | .052              |
|                        | BPV1 | .509              | -.123             | -.140             | -.026             | .008              | .026              |
|                        | BPV2 | -.123             | .363              | -.199             | -.078             | .074              | -.004             |
|                        | BPV3 | -.140             | -.199             | .403              | .047              | -.022             | -.046             |
|                        | BH1  | -.026             | -.078             | .047              | .338              | -.154             | -.174             |
|                        | BH2  | .008              | .074              | -.022             | -.154             | .448              | -.086             |
|                        | BH3  | .026              | -.004             | -.046             | -.174             | -.086             | .355              |
| Anti-image Correlation | BSI1 | -.164             | .105              | -.084             | -.059             | -.111             | .065              |
|                        | BSI2 |                   |                   |                   |                   |                   | -                 |
|                        |      | -.075             | .106              | .061              | .047              | -.042             | 5.763             |
|                        |      |                   |                   |                   |                   |                   | E-6               |
|                        | BSI3 | -.057             | -.095             | -.049             | .116              | -.200             | -.094             |
|                        | BSI4 | .118              | -.241             | .003              | .060              | -.103             | -.078             |
|                        | BHM1 | .124              | .022              | -.023             | -.079             | -.039             | -.033             |
|                        | BHM2 | -.122             | .041              | -.005             | .038              | .198              | -.214             |
|                        | BHM3 | .052              | -.115             | .042              | -.065             | -.167             | .147              |
|                        | BPV1 | .821 <sup>a</sup> | -.285             | -.309             | -.062             | .016              | .062              |
|                        | BPV2 | -.285             | .736 <sup>a</sup> | -.519             | -.222             | .184              | -.010             |
|                        | BPV3 | -.309             | -.519             | .776 <sup>a</sup> | .128              | -.051             | -.122             |
|                        | BH1  | -.062             | -.222             | .128              | .792 <sup>a</sup> | -.395             | -.504             |
|                        | BH2  | .016              | .184              | -.051             | -.395             | .802 <sup>a</sup> | -.216             |
|                        | BH3  | .062              | -.010             | -.122             | -.504             | -.216             | .836 <sup>a</sup> |

a. Measures of Sampling Adequacy(MSA)

| Communalities |         |            |
|---------------|---------|------------|
|               | Initial | Extraction |
| BSI1          | 1.000   | .773       |
| BSI2          | 1.000   | .821       |
| BSI3          | 1.000   | .349       |
| BSI4          | 1.000   | .391       |
| BHM1          | 1.000   | .813       |
| BHM2          | 1.000   | .901       |
| BHM3          | 1.000   | .785       |
| BPV1          | 1.000   | .703       |
| BPV2          | 1.000   | .819       |
| BPV3          | 1.000   | .796       |
| BH1           | 1.000   | .818       |
| BH2           | 1.000   | .786       |
| BH3           | 1.000   | .786       |

Extraction Method: Principal  
Component Analysis.

**Total Variance Explained**

| Component | Initial Eigenvalues |               |              | Extraction Sums of Squared Loadings |               |              | Rotation Sums of Squared Loadings |
|-----------|---------------------|---------------|--------------|-------------------------------------|---------------|--------------|-----------------------------------|
|           |                     |               |              |                                     |               |              |                                   |
|           | Total               | % of Variance | Cumulative % | Total                               | % of Variance | Cumulative % | Total                             |
| 1         | 4.823               | 37.102        | 37.102       | 4.823                               | 37.102        | 37.102       | 2.564                             |
| 2         | 1.832               | 14.093        | 51.195       | 1.832                               | 14.093        | 51.195       | 2.428                             |
| 3         | 1.648               | 12.677        | 63.871       | 1.648                               | 12.677        | 63.871       | 2.353                             |
| 4         | 1.238               | 9.526         | 73.398       | 1.238                               | 9.526         | 73.398       | 2.197                             |
| 5         | .772                | 5.936         | 79.334       |                                     |               |              |                                   |
| 6         | .707                | 5.442         | 84.776       |                                     |               |              |                                   |
| 7         | .398                | 3.065         | 87.841       |                                     |               |              |                                   |
| 8         | .369                | 2.839         | 90.680       |                                     |               |              |                                   |
| 9         | .335                | 2.578         | 93.258       |                                     |               |              |                                   |
| 10        | .299                | 2.301         | 95.559       |                                     |               |              |                                   |
| 11        | .249                | 1.914         | 97.472       |                                     |               |              |                                   |
| 12        | .195                | 1.502         | 98.974       |                                     |               |              |                                   |
| 13        | .133                | 1.026         | 100.000      |                                     |               |              |                                   |

**Total Variance Explained**

| Component | Rotation Sums of Squared Loadings |              |
|-----------|-----------------------------------|--------------|
|           | % of Variance                     | Cumulative % |
| 1         | 19.722                            | 19.722       |
| 2         | 18.678                            | 38.399       |
| 3         | 18.100                            | 56.499       |
| 4         | 16.899                            | 73.398       |
| 5         |                                   |              |
| 6         |                                   |              |
| 7         |                                   |              |
| 8         |                                   |              |
| 9         |                                   |              |
| 10        |                                   |              |
| 11        |                                   |              |
| 12        |                                   |              |
| 13        |                                   |              |

Extraction Method: Principal Component Analysis.

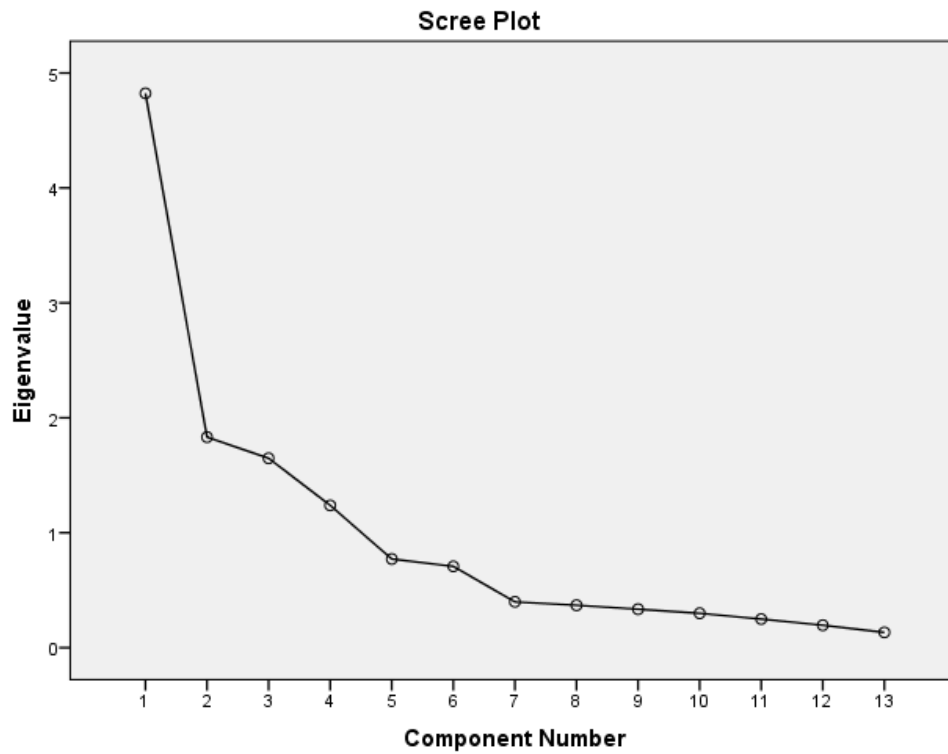

**Component Matrix<sup>a</sup>**

|      | Component |       |      |       |
|------|-----------|-------|------|-------|
|      | 1         | 2     | 3    | 4     |
| BH3  | .749      |       |      | -.439 |
| BH1  | .722      |       |      | -.521 |
| BHM2 | .715      | -.430 |      |       |
| BHM3 | .666      | -.422 |      |       |
| BHM1 | .659      | -.499 |      |       |
| BH2  | .630      |       |      | -.561 |
| BSI3 | .556      |       |      |       |
| BSI4 | .516      |       |      |       |
| BPV3 | .558      | .630  |      |       |
| BPV1 | .524      | .623  |      |       |
| BPV2 | .572      | .578  |      |       |
| BSI2 | .442      |       | .753 |       |
| BSI1 | .520      |       | .681 |       |

Extraction Method: Principal Component Analysis.<sup>a</sup>

a. 4 components extracted.

**Reproduced Correlations**

|                        |      | BSI1              | BSI2              | BSI3              | BSI4              | BHM1              | BHM2              | BHM3              | BPV1              |
|------------------------|------|-------------------|-------------------|-------------------|-------------------|-------------------|-------------------|-------------------|-------------------|
| Reproduced Correlation | BSI1 | .773 <sup>a</sup> | .788              | .411              | .507              | .182              | .244              | .195              | .291              |
|                        | BSI2 | .788              | .821 <sup>a</sup> | .372              | .485              | .158              | .220              | .169              | .220              |
|                        | BSI3 | .411              | .372              | .349 <sup>a</sup> | .355              | .269              | .308              | .280              | .342              |
|                        | BSI4 | .507              | .485              | .355              | .391 <sup>a</sup> | .208              | .256              | .223              | .340              |
|                        | BHM1 | .182              | .158              | .269              | .208              | .813 <sup>a</sup> | .846              | .795              | .107              |
|                        | BHM2 | .244              | .220              | .308              | .256              | .846              | .901 <sup>a</sup> | .839              | .199              |
|                        | BHM3 | .195              | .169              | .280              | .223              | .795              | .839              | .785 <sup>a</sup> | .168              |
|                        | BPV1 | .291              | .220              | .342              | .340              | .107              | .199              | .168              | .703 <sup>a</sup> |
|                        | BPV2 | .090              | -.012             | .316              | .258              | .196              | .270              | .250              | .708              |
|                        | BPV3 | .170              | .077              | .332              | .296              | .144              | .227              | .204              | .728              |
|                        | BH1  | .204              | .112              | .376              | .292              | .420              | .390              | .391              | .221              |
|                        | BH2  | .367              | .305              | .374              | .339              | .290              | .250              | .252              | .110              |
|                        | BH3  | .224              | .135              | .386              | .305              | .471              | .450              | .444              | .240              |
| Residual <sup>b</sup>  | BSI1 |                   | -.091             | -.116             | -.139             | .033              | -.021             | .003              | .011              |
|                        | BSI2 | -.091             |                   | -.068             | -.109             | -.018             | .017              | -.007             | .002              |
|                        | BSI3 | -.116             | -.068             |                   | -.105             | -.022             | -.037             | .019              | -.062             |
|                        | BSI4 | -.139             | -.109             | -.105             |                   | -.003             | .013              | -.034             | -.141             |
|                        | BHM1 | .033              | -.018             | -.022             | -.003             |                   | -.047             | -.132             | .004              |
|                        | BHM2 | -.021             | .017              | -.037             | .013              | -.047             |                   | -.060             | .016              |
|                        | BHM3 | .003              | -.007             | .019              | -.034             | -.132             | -.060             |                   | .007              |
|                        | BPV1 | .011              | .002              | -.062             | -.141             | .004              | .016              | .007              |                   |
|                        | BPV2 | .008              | .027              | -.033             | .052              | -.005             | -.014             | .007              | -.115             |
|                        | BPV3 | .026              | .014              | -.040             | -.040             | .026              | -.003             | -.009             | -.109             |
|                        | BH1  | .044              | .039              | -.104             | -.037             | -.006             | .002              | -.002             | .038              |
|                        | BH2  | -.013             | -.027             | -.003             | -.054             | .004              | -.004             | .060              | .042              |
|                        | BH3  | .002              | .042              | -.051             | .008              | -.012             | .026              | -.058             | -.002             |

**Reproduced Correlations**

|                        |      | BPV2              | BPV3 | BH1  | BH2  | BH3  |
|------------------------|------|-------------------|------|------|------|------|
| Reproduced Correlation | BSI1 | .090              | .170 | .204 | .367 | .224 |
|                        | BSI2 | -.012             | .077 | .112 | .305 | .135 |
|                        | BSI3 | .316              | .332 | .376 | .374 | .386 |
|                        | BSI4 | .258              | .296 | .292 | .339 | .305 |
|                        | BHM1 | .196              | .144 | .420 | .290 | .471 |
|                        | BHM2 | .270              | .227 | .390 | .250 | .450 |
|                        | BHM3 | .250              | .204 | .391 | .252 | .444 |
|                        | BPV1 | .708              | .728 | .221 | .110 | .240 |
|                        | BPV2 | .819 <sup>a</sup> | .799 | .358 | .154 | .371 |



|                       |      |       |                   |                   |                   |                   |
|-----------------------|------|-------|-------------------|-------------------|-------------------|-------------------|
|                       | BPV3 | .799  | .796 <sup>a</sup> | .311              | .141              | .325              |
|                       | BH1  | .358  | .311              | .818 <sup>a</sup> | .744              | .798              |
|                       | BH2  | .154  | .141              | .744              | .786 <sup>a</sup> | .716              |
|                       | BH3  | .371  | .325              | .798              | .716              | .786 <sup>a</sup> |
| Residual <sup>b</sup> | BSI1 | .008  | .026              | .044              | -.013             | .002              |
|                       | BSI2 | .027  | .014              | .039              | -.027             | .042              |
|                       | BSI3 | -.033 | -.040             | -.104             | -.003             | -.051             |
|                       | BSI4 | .052  | -.040             | -.037             | -.054             | .008              |
|                       | BHM1 | -.005 | .026              | -.006             | .004              | -.012             |
|                       | BHM2 | -.014 | -.003             | .002              | -.004             | .026              |
|                       | BHM3 | .007  | -.009             | -.002             | .060              | -.058             |
|                       | BPV1 | -.115 | -.109             | .038              | .042              | -.002             |
|                       | BPV2 |       | -.076             | .010              | -.012             | -.022             |
|                       | BPV3 | -.076 |                   | -.033             | .035              | .003              |
|                       | BH1  | .010  | -.033             |                   | -.095             | -.052             |
|                       | BH2  | -.012 | .035              | -.095             |                   | -.123             |
|                       | BH3  | -.022 | .003              | -.052             | -.123             |                   |

Extraction Method: Principal Component Analysis.

a. Reproduced communalities

b. Residuals are computed between observed and reproduced correlations. There are 22 (28.0%) non-redundant residuals with absolute values greater than 0.05.

**Rotated Component Matrix<sup>a</sup>**

|      | Component |      |      |      |
|------|-----------|------|------|------|
|      | 1         | 2    | 3    | 4    |
| BHM2 | .913      |      |      |      |
| BHM1 | .866      |      |      |      |
| BHM3 | .853      |      |      |      |
| BPV2 |           | .876 |      |      |
| BPV3 |           | .874 |      |      |
| BPV1 |           | .797 |      |      |
| BH1  |           |      | .845 |      |
| BH2  |           |      | .832 |      |
| BH3  |           |      | .797 |      |
| BSI2 |           |      |      | .902 |
| BSI1 |           |      |      | .862 |
| BSI4 |           |      |      | .522 |
| BSI3 |           |      |      |      |

Extraction Method: Principal Component Analysis.

Rotation Method: Varimax with Kaiser

Normalization.<sup>a</sup>

a. Rotation converged in 5 iterations.

## Part SM2 Factor Analysis (Vlogging)

**Descriptive Statistics**

|      | Mean | Std.<br>Deviation | Analysis N | Missing N |
|------|------|-------------------|------------|-----------|
| VSI1 | 2.95 | .892              | 135        | 0         |
| VSI2 | 2.96 | .909              | 135        | 0         |
| VSI3 | 3.56 | .825              | 135        | 0         |
| VSI4 | 3.20 | 1.042             | 135        | 0         |
| VHM1 | 4.01 | .758              | 135        | 0         |
| VHM2 | 3.96 | .737              | 135        | 0         |
| VHM3 | 3.87 | .876              | 135        | 0         |
| VPV1 | 3.63 | .817              | 135        | 0         |
| VPV2 | 3.47 | .880              | 135        | 0         |
| VPV3 | 3.40 | .866              | 135        | 0         |
| VH1  | 2.93 | 1.160             | 135        | 0         |
| VH2  | 2.35 | 1.081             | 135        | 0         |
| VH3  | 3.00 | 1.037             | 135        | 0         |

**Correlation Matrix<sup>a</sup>**

|                 |      | VSI1  | VSI2  | VSI3  | VSI4  | VHM1  | VHM2  | VHM3  | VPV1  | VPV2  |
|-----------------|------|-------|-------|-------|-------|-------|-------|-------|-------|-------|
| Correlation     | VSI1 | 1.000 | .366  | .233  | .469  | .188  | .224  | .202  | -.016 | .241  |
|                 | VSI2 | .366  | 1.000 | .108  | .472  | .141  | .232  | .219  | .122  | .162  |
|                 | VSI3 | .233  | .108  | 1.000 | .250  | .089  | .219  | .130  | .212  | .164  |
|                 | VSI4 | .469  | .472  | .250  | 1.000 | .348  | .369  | .346  | .018  | .107  |
|                 | VHM1 | .188  | .141  | .089  | .348  | 1.000 | .748  | .709  | .149  | .252  |
|                 | VHM2 | .224  | .232  | .219  | .369  | .748  | 1.000 | .790  | .163  | .246  |
|                 | VHM3 | .202  | .219  | .130  | .346  | .709  | .790  | 1.000 | .226  | .301  |
|                 | VPV1 | -.016 | .122  | .212  | .018  | .149  | .163  | .226  | 1.000 | .391  |
|                 | VPV2 | .241  | .162  | .164  | .107  | .252  | .246  | .301  | .391  | 1.000 |
|                 | VPV3 | .172  | .133  | .069  | .101  | .246  | .257  | .293  | .443  | .563  |
|                 | VH1  | .364  | .266  | .188  | .326  | .442  | .381  | .498  | .123  | .382  |
|                 | VH2  | .336  | .256  | .122  | .295  | .243  | .260  | .330  | .020  | .288  |
|                 | VH3  | .266  | .340  | .157  | .331  | .351  | .391  | .370  | .282  | .344  |
| Sig. (1-tailed) | VSI1 |       | .000  | .003  | .000  | .014  | .005  | .010  | .426  | .002  |
|                 | VSI2 | .000  |       | .107  | .000  | .051  | .003  | .005  | .079  | .030  |
|                 | VSI3 | .003  | .107  |       | .002  | .153  | .005  | .067  | .007  | .028  |
|                 | VSI4 | .000  | .000  | .002  |       | .000  | .000  | .000  | .420  | .107  |
|                 | VHM1 | .014  | .051  | .153  | .000  |       | .000  | .000  | .042  | .002  |
|                 | VHM2 | .005  | .003  | .005  | .000  | .000  |       | .000  | .030  | .002  |
|                 | VHM3 | .010  | .005  | .067  | .000  | .000  | .000  |       | .004  | .000  |

|      |      |      |      |      |      |      |      |      |      |
|------|------|------|------|------|------|------|------|------|------|
| VPV1 | .426 | .079 | .007 | .420 | .042 | .030 | .004 |      | .000 |
| VPV2 | .002 | .030 | .028 | .107 | .002 | .002 | .000 | .000 |      |
| VPV3 | .023 | .062 | .213 | .122 | .002 | .001 | .000 | .000 | .000 |
| VH1  | .000 | .001 | .015 | .000 | .000 | .000 | .000 | .077 | .000 |
| VH2  | .000 | .001 | .080 | .000 | .002 | .001 | .000 | .407 | .000 |
| VH3  | .001 | .000 | .034 | .000 | .000 | .000 | .000 | .000 | .000 |

**Correlation Matrix<sup>a</sup>**

|                 |      | VPV3  | VH1   | VH2   | VH3   |
|-----------------|------|-------|-------|-------|-------|
| Correlation     | VSI1 | .172  | .364  | .336  | .266  |
|                 | VSI2 | .133  | .266  | .256  | .340  |
|                 | VSI3 | .069  | .188  | .122  | .157  |
|                 | VSI4 | .101  | .326  | .295  | .331  |
|                 | VHM1 | .246  | .442  | .243  | .351  |
|                 | VHM2 | .257  | .381  | .260  | .391  |
|                 | VHM3 | .293  | .498  | .330  | .370  |
|                 | VPV1 | .443  | .123  | .020  | .282  |
|                 | VPV2 | .563  | .382  | .288  | .344  |
|                 | VPV3 | 1.000 | .294  | .169  | .291  |
|                 | VH1  | .294  | 1.000 | .709  | .602  |
|                 | VH2  | .169  | .709  | 1.000 | .559  |
|                 | VH3  | .291  | .602  | .559  | 1.000 |
| Sig. (1-tailed) | VSI1 | .023  | .000  | .000  | .001  |
|                 | VSI2 | .062  | .001  | .001  | .000  |
|                 | VSI3 | .213  | .015  | .080  | .034  |
|                 | VSI4 | .122  | .000  | .000  | .000  |
|                 | VHM1 | .002  | .000  | .002  | .000  |
|                 | VHM2 | .001  | .000  | .001  | .000  |
|                 | VHM3 | .000  | .000  | .000  | .000  |
|                 | VPV1 | .000  | .077  | .407  | .000  |
|                 | VPV2 | .000  | .000  | .000  | .000  |
|                 | VPV3 |       | .000  | .025  | .000  |
|                 | VH1  | .000  |       | .000  | .000  |
|                 | VH2  | .025  | .000  |       | .000  |
|                 | VH3  | .000  | .000  | .000  |       |

a. Determinant = .004

**Inverse of Correlation Matrix**

|      | VSI1  | VSI2  | VSI3  | VSI4  | VHM1   | VHM2   | VHM3   | VPV1  | VPV2  | VPV3  |
|------|-------|-------|-------|-------|--------|--------|--------|-------|-------|-------|
| VSI1 | 1.505 | -.241 | -.170 | -.467 | .038   | -.078  | .142   | .209  | -.198 | -.114 |
| VSI2 | -.241 | 1.437 | .126  | -.532 | .283   | -.177  | -.027  | -.138 | -.033 | .035  |
| VSI3 | -.170 | .126  | 1.243 | -.259 | .288   | -.508  | .258   | -.329 | -.106 | .181  |
| VSI4 | -.467 | -.532 | -.259 | 1.731 | -.334  | .020   | -.179  | .136  | .181  | -.006 |
| VHM1 | .038  | .283  | .288  | -.334 | 2.745  | -1.444 | -.571  | -.037 | -.092 | .031  |
| VHM2 | -.078 | -.177 | -.508 | .020  | -1.444 | 3.758  | -2.013 | .294  | .080  | -.175 |
| VHM3 | .142  | -.027 | .258  | -.179 | -.571  | -2.013 | 3.397  | -.375 | -.088 | -.007 |
| VPV1 | .209  | -.138 | -.329 | .136  | -.037  | .294   | -.375  | 1.536 | -.281 | -.466 |
| VPV2 | -.198 | -.033 | -.106 | .181  | -.092  | .080   | -.088  | -.281 | 1.709 | -.685 |
| VPV3 | -.114 | .035  | .181  | -.006 | .031   | -.175  | -.007  | -.466 | -.685 | 1.677 |
| VH1  | -.230 | -.030 | -.253 | .100  | -.613  | .697   | -.785  | .213  | -.182 | -.188 |
| VH2  | -.132 | -.004 | .064  | -.085 | .344   | -.035  | -.109  | .238  | -.139 | .118  |
| VH3  | .082  | -.229 | .088  | -.164 | -.021  | -.521  | .393   | -.427 | -.067 | -.022 |

**Inverse of Correlation Matrix**

|      | VH1    | VH2    | VH3   |
|------|--------|--------|-------|
| VSI1 | -.230  | -.132  | .082  |
| VSI2 | -.030  | -.004  | -.229 |
| VSI3 | -.253  | .064   | .088  |
| VSI4 | .100   | -.085  | -.164 |
| VHM1 | -.613  | .344   | -.021 |
| VHM2 | .697   | -.035  | -.521 |
| VHM3 | -.785  | -.109  | .393  |
| VPV1 | .213   | .238   | -.427 |
| VPV2 | -.182  | -.139  | -.067 |
| VPV3 | -.188  | .118   | -.022 |
| VH1  | 2.930  | -1.315 | -.659 |
| VH2  | -1.315 | 2.278  | -.549 |
| VH3  | -.659  | -.549  | 2.016 |

**KMO and Bartlett's Test**

|                                                  |                    |         |
|--------------------------------------------------|--------------------|---------|
| Kaiser-Meyer-Olkin Measure of Sampling Adequacy. |                    | .790    |
| Bartlett's Test of Sphericity                    | Approx. Chi-Square | 726.266 |
|                                                  | df                 | 78      |
|                                                  | Sig.               | .000    |

**Anti-image Matrices**

|                       |                        | VSI1  | VSI2              | VSI3              | VSI4              | VHM1              | VHM2              | VHM3              | VPV1              |
|-----------------------|------------------------|-------|-------------------|-------------------|-------------------|-------------------|-------------------|-------------------|-------------------|
| Anti-image Covariance | VSI1                   | .664  | -.111             | -.091             | -.179             | .009              | -.014             | .028              | .090              |
|                       | VSI2                   | -.111 | .696              | .070              | -.214             | .072              | -.033             | -.006             | -.063             |
|                       | VSI3                   | -.091 | .070              | .804              | -.120             | .084              | -.109             | .061              | -.172             |
|                       | VSI4                   | -.179 | -.214             | -.120             | .578              | -.070             | .003              | -.030             | .051              |
|                       | VHM1                   | .009  | .072              | .084              | -.070             | .364              | -.140             | -.061             | -.009             |
|                       | VHM2                   | -.014 | -.033             | -.109             | .003              | -.140             | .266              | -.158             | .051              |
|                       | VHM3                   | .028  | -.006             | .061              | -.030             | -.061             | -.158             | .294              | -.072             |
|                       | VPV1                   | .090  | -.063             | -.172             | .051              | -.009             | .051              | -.072             | .651              |
|                       | VPV2                   | -.077 | -.013             | -.050             | .061              | -.020             | .012              | -.015             | -.107             |
|                       | VPV3                   | -.045 | .015              | .087              | -.002             | .007              | -.028             | -.001             | -.181             |
|                       | VH1                    | -.052 | -.007             | -.069             | .020              | -.076             | .063              | -.079             | .047              |
|                       | VH2                    | -.039 | -.001             | .022              | -.022             | .055              | -.004             | -.014             | .068              |
|                       | VH3                    | .027  | -.079             | .035              | -.047             | -.004             | -.069             | .057              | -.138             |
|                       | Anti-image Correlation | VSI1  | .832 <sup>a</sup> | -.164             | -.124             | -.289             | .019              | -.033             | .063              |
| VSI2                  |                        | -.164 | .797 <sup>a</sup> | .094              | -.337             | .142              | -.076             | -.012             | -.093             |
| VSI3                  |                        | -.124 | .094              | .584 <sup>a</sup> | -.177             | .156              | -.235             | .126              | -.238             |
| VSI4                  |                        | -.289 | -.337             | -.177             | .808 <sup>a</sup> | -.153             | .008              | -.074             | .084              |
| VHM1                  |                        | .019  | .142              | .156              | -.153             | .826 <sup>a</sup> | -.449             | -.187             | -.018             |
| VHM2                  |                        | -.033 | -.076             | -.235             | .008              | -.449             | .745 <sup>a</sup> | -.564             | .122              |
| VHM3                  |                        | .063  | -.012             | .126              | -.074             | -.187             | -.564             | .808 <sup>a</sup> | -.164             |
| VPV1                  |                        | .138  | -.093             | -.238             | .084              | -.018             | .122              | -.164             | .645 <sup>a</sup> |
| VPV2                  |                        | -.124 | -.021             | -.073             | .105              | -.043             | .032              | -.037             | -.173             |
| VPV3                  |                        | -.072 | .023              | .125              | -.004             | .014              | -.070             | -.003             | -.291             |
| VH1                   |                        | -.110 | -.015             | -.132             | .044              | -.216             | .210              | -.249             | .100              |
| VH2                   |                        | -.071 | -.002             | .038              | -.043             | .138              | -.012             | -.039             | .127              |
| VH3                   |                        | .047  | -.134             | .056              | -.088             | -.009             | -.189             | .150              | -.243             |

**Anti-image Matrices**

|                       |      | VPV2  | VPV3  | VH1   | VH2   | VH3   |
|-----------------------|------|-------|-------|-------|-------|-------|
| Anti-image Covariance | VSI1 | -.077 | -.045 | -.052 | -.039 | .027  |
|                       | VSI2 | -.013 | .015  | -.007 | -.001 | -.079 |
|                       | VSI3 | -.050 | .087  | -.069 | .022  | .035  |
|                       | VSI4 | .061  | -.002 | .020  | -.022 | -.047 |
|                       | VH   |       |       |       |       |       |
|                       | M1   | -.020 | .007  | -.076 | .055  | -.004 |
|                       | VH   |       |       |       |       |       |
|                       | M2   | .012  | -.028 | .063  | -.004 | -.069 |

|                        |      |                   |                   |                   |                   |                   |
|------------------------|------|-------------------|-------------------|-------------------|-------------------|-------------------|
|                        | VH   | -.015             | -.001             | -.079             | -.014             | .057              |
|                        | M3   |                   |                   |                   |                   |                   |
|                        | VPV  |                   |                   |                   |                   |                   |
|                        | 1    | -.107             | -.181             | .047              | .068              | -.138             |
|                        | VPV  |                   |                   |                   |                   |                   |
|                        | 2    | .585              | -.239             | -.036             | -.036             | -.020             |
|                        | VPV  |                   |                   |                   |                   |                   |
|                        | 3    | -.239             | .596              | -.038             | .031              | -.007             |
|                        | VH1  | -.036             | -.038             | .341              | -.197             | -.112             |
|                        | VH2  | -.036             | .031              | -.197             | .439              | -.120             |
|                        | VH3  | -.020             | -.007             | -.112             | -.120             | .496              |
| Anti-image Correlation | VSI1 | -.124             | -.072             | -.110             | -.071             | .047              |
|                        | VSI2 | -.021             | .023              | -.015             | -.002             | -.134             |
|                        | VSI3 | -.073             | .125              | -.132             | .038              | .056              |
|                        | VSI4 | .105              | -.004             | .044              | -.043             | -.088             |
|                        | VH   |                   |                   |                   |                   |                   |
|                        | M1   | -.043             | .014              | -.216             | .138              | -.009             |
|                        | VH   |                   |                   |                   |                   |                   |
|                        | M2   | .032              | -.070             | .210              | -.012             | -.189             |
|                        | VH   |                   |                   |                   |                   |                   |
|                        | M3   | -.037             | -.003             | -.249             | -.039             | .150              |
|                        | VPV  |                   |                   |                   |                   |                   |
|                        | 1    | -.173             | -.291             | .100              | .127              | -.243             |
|                        | VPV  |                   |                   |                   |                   |                   |
|                        | 2    | .826 <sup>a</sup> | -.405             | -.081             | -.071             | -.036             |
|                        | VPV  |                   |                   |                   |                   |                   |
|                        | 3    | -.405             | .776 <sup>a</sup> | -.085             | .060              | -.012             |
|                        | VH1  | -.081             | -.085             | .791 <sup>a</sup> | -.509             | -.271             |
|                        | VH2  | -.071             | .060              | -.509             | .792 <sup>a</sup> | -.256             |
|                        | VH3  | -.036             | -.012             | -.271             | -.256             | .854 <sup>a</sup> |

a. Measures of Sampling Adequacy(MSA)

| Communalities |         |            |
|---------------|---------|------------|
|               | Initial | Extraction |
| VSI1          | 1.000   | .574       |
| VSI2          | 1.000   | .505       |
| VSI3          | 1.000   | .416       |
| VSI4          | 1.000   | .693       |
| VHM1          | 1.000   | .815       |
| VHM2          | 1.000   | .858       |
| VHM3          | 1.000   | .827       |

|      |       |      |
|------|-------|------|
| VPV1 | 1.000 | .677 |
| VPV2 | 1.000 | .652 |
| VPV3 | 1.000 | .649 |
| VH1  | 1.000 | .788 |
| VH2  | 1.000 | .802 |
| VH3  | 1.000 | .619 |

Extraction Method: Principal  
Component Analysis.

**Total Variance Explained**

| Component | Initial Eigenvalues |               |              | Extraction Sums of Squared Loadings |               |              | Rotation Sums of Squared Loadings |
|-----------|---------------------|---------------|--------------|-------------------------------------|---------------|--------------|-----------------------------------|
|           |                     |               |              | Loadings                            |               |              |                                   |
|           | Total               | % of Variance | Cumulative % | Total                               | % of Variance | Cumulative % | Total                             |
| 1         | 4.652               | 35.783        | 35.783       | 4.652                               | 35.783        | 35.783       | 2.587                             |
| 2         | 1.619               | 12.451        | 48.234       | 1.619                               | 12.451        | 48.234       | 2.305                             |
| 3         | 1.455               | 11.189        | 59.423       | 1.455                               | 11.189        | 59.423       | 2.008                             |
| 4         | 1.152               | 8.860         | 68.283       | 1.152                               | 8.860         | 68.283       | 1.977                             |
| 5         | .908                | 6.985         | 75.268       |                                     |               |              |                                   |
| 6         | .775                | 5.958         | 81.226       |                                     |               |              |                                   |
| 7         | .484                | 3.726         | 84.952       |                                     |               |              |                                   |
| 8         | .450                | 3.465         | 88.417       |                                     |               |              |                                   |
| 9         | .405                | 3.119         | 91.536       |                                     |               |              |                                   |
| 10        | .397                | 3.054         | 94.590       |                                     |               |              |                                   |
| 11        | .302                | 2.321         | 96.911       |                                     |               |              |                                   |
| 12        | .250                | 1.923         | 98.834       |                                     |               |              |                                   |
| 13        | .152                | 1.166         | 100.000      |                                     |               |              |                                   |

**Total Variance Explained**

| Component | Rotation Sums of Squared Loadings |              |
|-----------|-----------------------------------|--------------|
|           | % of Variance                     | Cumulative % |
| 1         | 19.898                            | 19.898       |
| 2         | 17.730                            | 37.628       |
| 3         | 15.444                            | 53.073       |
| 4         | 15.210                            | 68.283       |
| 5         |                                   |              |
| 6         |                                   |              |
| 7         |                                   |              |
| 8         |                                   |              |
| 9         |                                   |              |
| 10        |                                   |              |
| 11        |                                   |              |



|    |  |  |
|----|--|--|
| 12 |  |  |
| 13 |  |  |

Extraction Method: Principal Component Analysis.

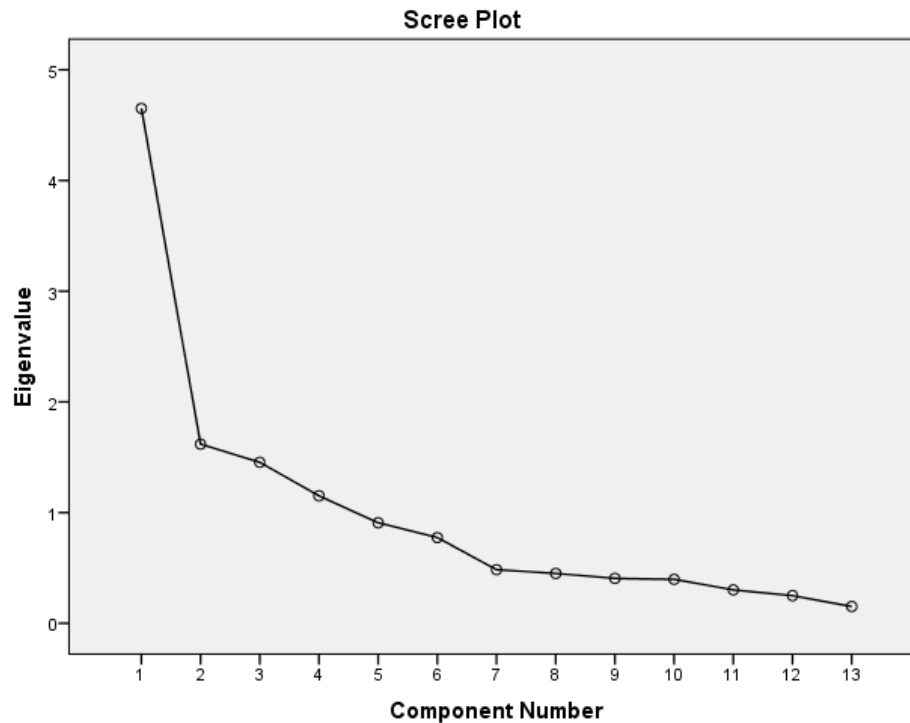

**Component Matrix<sup>a</sup>**

|      | Component |       |       |       |
|------|-----------|-------|-------|-------|
|      | 1         | 2     | 3     | 4     |
| VH1  | .764      |       |       | -.410 |
| VHM3 | .755      |       | -.500 |       |
| VHM2 | .731      |       | -.553 |       |
| VH3  | .709      |       |       |       |
| VHM1 | .692      |       | -.577 |       |
| VH2  | .629      |       |       | -.514 |
| VSI4 | .575      | -.477 |       |       |
| VPV2 | .555      | .488  |       |       |
| VSI1 | .508      | -.402 |       |       |
| VSI2 | .473      |       |       |       |
| VPV1 |           | .660  |       |       |
| VPV3 | .496      | .589  |       |       |
| VSI3 |           |       |       | .528  |

Extraction Method: Principal Component Analysis.<sup>a</sup>

a. 4 components extracted.

**Reproduced Correlations**

|                           |      | VSI1              | VSI2              | VSI3              | VSI4              | VHM1              | VHM2              | VHM3              | VPV1              |
|---------------------------|------|-------------------|-------------------|-------------------|-------------------|-------------------|-------------------|-------------------|-------------------|
| Reproduced<br>Correlation | VSI1 | .574 <sup>a</sup> | .533              | .355              | .577              | .141              | .211              | .186              | .041              |
|                           | VSI2 | .533              | .505 <sup>a</sup> | .372              | .552              | .145              | .220              | .187              | .082              |
|                           | VSI3 | .355              | .372              | .416 <sup>a</sup> | .400              | .107              | .196              | .142              | .273              |
|                           | VSI4 | .577              | .552              | .400              | .693 <sup>a</sup> | .349              | .436              | .374              | -.006             |
|                           | VHM1 | .141              | .145              | .107              | .349              | .815 <sup>a</sup> | .826              | .816              | .155              |
|                           | VHM2 | .211              | .220              | .196              | .436              | .826              | .858 <sup>a</sup> | .831              | .193              |
|                           | VHM3 | .186              | .187              | .142              | .374              | .816              | .831              | .827 <sup>a</sup> | .214              |
|                           | VPV1 | .041              | .082              | .273              | -.006             | .155              | .193              | .214              | .677 <sup>a</sup> |
|                           | VPV2 | .184              | .179              | .204              | .086              | .224              | .237              | .299              | .573              |
|                           | VPV3 | .100              | .113              | .202              | .027              | .242              | .257              | .310              | .621              |
|                           | VH1  | .391              | .321              | .059              | .350              | .439              | .421              | .494              | .102              |
|                           | VH2  | .396              | .309              | -.010             | .305              | .264              | .233              | .316              | -.039             |
|                           | VH3  | .379              | .324              | .128              | .328              | .366              | .364              | .426              | .203              |
| Residual <sup>b</sup>     | VSI1 |                   | -.168             | -.123             | -.108             | .047              | .013              | .016              | -.057             |
|                           | VSI2 | -.168             |                   | -.265             | -.079             | -.004             | .011              | .032              | .040              |
|                           | VSI3 | -.123             | -.265             |                   | -.150             | -.018             | .022              | -.012             | -.061             |
|                           | VSI4 | -.108             | -.079             | -.150             |                   | -.002             | -.067             | -.027             | .024              |
|                           | VHM1 | .047              | -.004             | -.018             | -.002             |                   | -.078             | -.106             | -.006             |
|                           | VHM2 | .013              | .011              | .022              | -.067             | -.078             |                   | -.041             | -.030             |
|                           | VHM3 | .016              | .032              | -.012             | -.027             | -.106             | -.041             |                   | .012              |
|                           | VPV1 | -.057             | .040              | -.061             | .024              | -.006             | -.030             | .012              |                   |
|                           | VPV2 | .057              | -.017             | -.040             | .021              | .028              | .009              | .001              | -.182             |
|                           | VPV3 | .072              | .020              | -.133             | .074              | .004              | .000              | -.017             | -.178             |
|                           | VH1  | -.027             | -.054             | .129              | -.025             | .002              | -.040             | .004              | .021              |
|                           | VH2  | -.060             | -.053             | .132              | -.010             | -.021             | .026              | .015              | .059              |
|                           | VH3  | -.113             | .016              | .029              | .004              | -.014             | .026              | -.056             | .079              |

**Reproduced Correlations**

|                        |      | VPV2              | VPV3 | VH1  | VH2   | VH3  |
|------------------------|------|-------------------|------|------|-------|------|
| Reproduced Correlation | VSI1 | .184              | .100 | .391 | .396  | .379 |
|                        | VSI2 | .179              | .113 | .321 | .309  | .324 |
|                        | VSI3 | .204              | .202 | .059 | -.010 | .128 |
|                        | VSI4 | .086              | .027 | .350 | .305  | .328 |
|                        | VHM1 | .224              | .242 | .439 | .264  | .366 |
|                        | VHM2 | .237              | .257 | .421 | .233  | .364 |
|                        | VHM3 | .299              | .310 | .494 | .316  | .426 |
|                        | VPV1 | .573              | .621 | .102 | -.039 | .203 |
|                        | VPV2 | .652 <sup>a</sup> | .637 | .425 | .327  | .461 |

|                       |      |       |                   |                   |                   |                   |
|-----------------------|------|-------|-------------------|-------------------|-------------------|-------------------|
|                       | VPV3 | .637  | .649 <sup>a</sup> | .326              | .203              | .379              |
|                       | VH1  | .425  | .326              | .788 <sup>a</sup> | .763              | .684              |
|                       | VH2  | .327  | .203              | .763              | .802 <sup>a</sup> | .646              |
|                       | VH3  | .461  | .379              | .684              | .646              | .619 <sup>a</sup> |
| Residual <sup>b</sup> | VSI1 | .057  | .072              | -.027             | -.060             | -.113             |
|                       | VSI2 | -.017 | .020              | -.054             | -.053             | .016              |
|                       | VSI3 | -.040 | -.133             | .129              | .132              | .029              |
|                       | VSI4 | .021  | .074              | -.025             | -.010             | .004              |
|                       | VHM1 | .028  | .004              | .002              | -.021             | -.014             |
|                       | VHM2 | .009  | .000              | -.040             | .026              | .026              |
|                       | VHM3 | .001  | -.017             | .004              | .015              | -.056             |
|                       | VPV1 | -.182 | -.178             | .021              | .059              | .079              |
|                       | VPV2 |       | -.074             | -.043             | -.039             | -.117             |
|                       | VPV3 | -.074 |                   | -.032             | -.034             | -.088             |
|                       | VH1  | -.043 | -.032             |                   | -.054             | -.082             |
|                       | VH2  | -.039 | -.034             | -.054             |                   | -.087             |
|                       | VH3  | -.117 | -.088             | -.082             | -.087             |                   |

Extraction Method: Principal Component Analysis.

a. Reproduced communalities

b. Residuals are computed between observed and reproduced correlations. There are 32 (41.0%) nonredundant residuals with absolute values greater than 0.05.

**Rotated Component Matrix<sup>a</sup>**

|      | Component |      |      |      |
|------|-----------|------|------|------|
|      | 1         | 2    | 3    | 4    |
| VHM2 | .887      |      |      |      |
| VHM1 | .876      |      |      |      |
| VHM3 | .854      |      |      |      |
| VH2  |           | .875 |      |      |
| VH1  |           | .800 |      |      |
| VH3  |           | .665 |      |      |
| VPV1 |           |      | .809 |      |
| VPV3 |           |      | .768 |      |
| VPV2 |           |      | .725 |      |
| VSI4 |           |      |      | .746 |
| VSI1 |           |      |      | .684 |
| VSI2 |           |      |      | .670 |
| VSI3 |           |      |      | .571 |

Extraction Method: Principal Component Analysis.

Rotation Method: Varimax with Kaiser

Normalization.<sup>a</sup>

a. Rotation converged in 5 iterations.

### Part SM3: Factor Analysis (Pop-Up Stores)

**Descriptive Statistics**

|      | Mean | Std.<br>Deviation | Analysis N | Missing N |
|------|------|-------------------|------------|-----------|
| PSI1 | 2.98 | .853              | 89         | 0         |
| PSI2 | 3.07 | .902              | 89         | 0         |
| PSI3 | 3.31 | .806              | 89         | 0         |
| PSI4 | 3.29 | .907              | 89         | 0         |
| PHM1 | 3.60 | .822              | 89         | 0         |
| PHM2 | 3.61 | .820              | 89         | 0         |
| PHM3 | 3.29 | .894              | 89         | 0         |
| PPV1 | 3.45 | .840              | 89         | 0         |
| PPV2 | 3.46 | .770              | 89         | 0         |
| PPV3 | 3.52 | .709              | 89         | 0         |
| PH1  | 2.55 | 1.023             | 89         | 0         |
| PH2  | 2.06 | .884              | 89         | 0         |
| PH3  | 2.65 | 1.056             | 89         | 0         |

**Correlation Matrix<sup>a</sup>**

|                 |      | PSI1  | PSI2  | PSI3  | PSI4  | PHM1  | PHM2  | PHM3  | PPV1  |
|-----------------|------|-------|-------|-------|-------|-------|-------|-------|-------|
| Correlation     | PSI1 | 1.000 | .652  | .258  | .258  | .246  | .198  | .188  | .332  |
|                 | PSI2 | .652  | 1.000 | .252  | .517  | .497  | .420  | .398  | .230  |
|                 | PSI3 | .258  | .252  | 1.000 | .355  | .349  | .292  | .265  | .410  |
|                 | PSI4 | .258  | .517  | .355  | 1.000 | .572  | .492  | .454  | .258  |
|                 | PHM1 | .246  | .497  | .349  | .572  | 1.000 | .840  | .704  | .448  |
|                 | PHM2 | .198  | .420  | .292  | .492  | .840  | 1.000 | .778  | .425  |
|                 | PHM3 | .188  | .398  | .265  | .454  | .704  | .778  | 1.000 | .292  |
|                 | PPV1 | .332  | .230  | .410  | .258  | .448  | .425  | .292  | 1.000 |
|                 | PPV2 | .310  | .217  | .368  | .245  | .370  | .416  | .265  | .678  |
|                 | PPV3 | .377  | .371  | .170  | .187  | .226  | .217  | .225  | .541  |
|                 | PH1  | .145  | .181  | .201  | .155  | .336  | .396  | .294  | .344  |
|                 | PH2  | .092  | .095  | .087  | .079  | .251  | .344  | .310  | .119  |
|                 | PH3  | .218  | .192  | .130  | .179  | .359  | .417  | .386  | .281  |
| Sig. (1-tailed) | PSI1 |       | .000  | .007  | .007  | .010  | .031  | .039  | .001  |
|                 | PSI2 | .000  |       | .009  | .000  | .000  | .000  | .000  | .015  |
|                 | PSI3 | .007  | .009  |       | .000  | .000  | .003  | .006  | .000  |
|                 | PSI4 | .007  | .000  | .000  |       | .000  | .000  | .000  | .007  |
|                 | PHM1 | .010  | .000  | .000  | .000  |       | .000  | .000  | .000  |
|                 | PHM2 | .031  | .000  | .003  | .000  | .000  |       | .000  | .000  |
|                 | PHM3 | .039  | .000  | .006  | .000  | .000  | .000  |       | .003  |

|      |      |      |      |      |      |      |      |      |
|------|------|------|------|------|------|------|------|------|
| PPV1 | .001 | .015 | .000 | .007 | .000 | .000 | .003 |      |
| PPV2 | .002 | .021 | .000 | .010 | .000 | .000 | .006 | .000 |
| PPV3 | .000 | .000 | .056 | .040 | .016 | .021 | .017 | .000 |
| PH1  | .088 | .045 | .029 | .073 | .001 | .000 | .003 | .000 |
| PH2  | .195 | .188 | .210 | .232 | .009 | .000 | .002 | .134 |
| PH3  | .020 | .036 | .112 | .047 | .000 | .000 | .000 | .004 |

**Correlation Matrix<sup>a</sup>**

|                 |      | PPV2  | PPV3  | PH1   | PH2   | PH3   |
|-----------------|------|-------|-------|-------|-------|-------|
| Correlation     | PSI1 | .310  | .377  | .145  | .092  | .218  |
|                 | PSI2 | .217  | .371  | .181  | .095  | .192  |
|                 | PSI3 | .368  | .170  | .201  | .087  | .130  |
|                 | PSI4 | .245  | .187  | .155  | .079  | .179  |
|                 | PHM1 | .370  | .226  | .336  | .251  | .359  |
|                 | PHM2 | .416  | .217  | .396  | .344  | .417  |
|                 | PHM3 | .265  | .225  | .294  | .310  | .386  |
|                 | PPV1 | .678  | .541  | .344  | .119  | .281  |
|                 | PPV2 | 1.000 | .642  | .439  | .262  | .353  |
|                 | PPV3 | .642  | 1.000 | .293  | .171  | .289  |
|                 | PH1  | .439  | .293  | 1.000 | .707  | .695  |
|                 | PH2  | .262  | .171  | .707  | 1.000 | .642  |
|                 | PH3  | .353  | .289  | .695  | .642  | 1.000 |
| Sig. (1-tailed) | PSI1 | .002  | .000  | .088  | .195  | .020  |
|                 | PSI2 | .021  | .000  | .045  | .188  | .036  |
|                 | PSI3 | .000  | .056  | .029  | .210  | .112  |
|                 | PSI4 | .010  | .040  | .073  | .232  | .047  |
|                 | PHM1 | .000  | .016  | .001  | .009  | .000  |
|                 | PHM2 | .000  | .021  | .000  | .000  | .000  |
|                 | PHM3 | .006  | .017  | .003  | .002  | .000  |
|                 | PPV1 | .000  | .000  | .000  | .134  | .004  |
|                 | PPV2 |       | .000  | .000  | .007  | .000  |
|                 | PPV3 | .000  |       | .003  | .055  | .003  |
|                 | PH1  | .000  | .003  |       | .000  | .000  |
|                 | PH2  | .007  | .055  | .000  |       | .000  |
|                 | PH3  | .000  | .003  | .000  | .000  |       |

a. Determinant = .000

**Inverse of Correlation Matrix**

|      | PSI1   | PSI2   | PSI3  | PSI4  | PHM1   | PHM2   | PHM3   | PPV1  | PPV2   | PPV3   |
|------|--------|--------|-------|-------|--------|--------|--------|-------|--------|--------|
| PSI1 | 2.123  | -1.561 | -.151 | .198  | .263   | .274   | .036   | -.436 | -.290  | .086   |
| PSI2 | -1.561 | 2.897  | -.034 | -.666 | -.694  | -.330  | -.008  | .566  | .575   | -.812  |
| PSI3 | -.151  | -.034  | 1.408 | -.286 | -.160  | .293   | -.206  | -.371 | -.358  | .328   |
| PSI4 | .198   | -.666  | -.286 | 1.772 | -.565  | .004   | -.142  | .068  | -.140  | .076   |
| PHM1 | .263   | -.694  | -.160 | -.565 | 4.261  | -2.540 | -.384  | -.635 | .151   | .231   |
| PHM2 | .274   | -.330  | .293  | .004  | -2.540 | 5.108  | -1.869 | -.280 | -.928  | .708   |
| PHM3 | .036   | -.008  | -.206 | -.142 | -.384  | -1.869 | 2.858  | .176  | .466   | -.465  |
| PPV1 | -.436  | .566   | -.371 | .068  | -.635  | -.280  | .176   | 2.437 | -.787  | -.624  |
| PPV2 | -.290  | .575   | -.358 | -.140 | .151   | -.928  | .466   | -.787 | 2.843  | -1.243 |
| PPV3 | .086   | -.812  | .328  | .076  | .231   | .708   | -.465  | -.624 | -1.243 | 2.268  |
| PH1  | .376   | -.403  | -.121 | .083  | .001   | -.123  | .324   | -.370 | -.433  | .115   |
| PH2  | -.130  | .222   | -.005 | .109  | .111   | -.278  | -.216  | .489  | -.029  | -.065  |
| PH3  | -.380  | .308   | .146  | -.057 | -.140  | -.066  | -.305  | .016  | .072   | -.196  |

**Inverse of Correlation Matrix**

|      | PH1    | PH2    | PH3    |
|------|--------|--------|--------|
| PSI1 | .376   | -.130  | -.380  |
| PSI2 | -.403  | .222   | .308   |
| PSI3 | -.121  | -.005  | .146   |
| PSI4 | .083   | .109   | -.057  |
| PHM1 | .001   | .111   | -.140  |
| PHM2 | -.123  | -.278  | -.066  |
| PHM3 | .324   | -.216  | -.305  |
| PPV1 | -.370  | .489   | .016   |
| PPV2 | -.433  | -.029  | .072   |
| PPV3 | .115   | -.065  | -.196  |
| PH1  | 2.913  | -1.305 | -1.041 |
| PH2  | -1.305 | 2.395  | -.612  |
| PH3  | -1.041 | -.612  | 2.354  |

**KMO and Bartlett's Test**

|                                                  |                    |         |
|--------------------------------------------------|--------------------|---------|
| Kaiser-Meyer-Olkin Measure of Sampling Adequacy. |                    | .797    |
| Bartlett's Test of Sphericity                    | Approx. Chi-Square | 634.319 |
|                                                  | df                 | 78      |
|                                                  | Sig.               | .000    |

**Anti-image Matrices**

|                           |      | PSI1              | PSI2              | PSI3              | PSI4              | PHM1              | PHM2              | PHM3              | PPV1              |
|---------------------------|------|-------------------|-------------------|-------------------|-------------------|-------------------|-------------------|-------------------|-------------------|
| Anti-image<br>Covariance  | PSI1 | .471              | -.254             | -.050             | .053              | .029              | .025              | .006              | -.084             |
|                           | PSI2 | -.254             | .345              | -.008             | -.130             | -.056             | -.022             | -.001             | .080              |
|                           | PSI3 | -.050             | -.008             | .710              | -.115             | -.027             | .041              | -.051             | -.108             |
|                           | PSI4 | .053              | -.130             | -.115             | .564              | -.075             | .000              | -.028             | .016              |
|                           | PHM1 | .029              | -.056             | -.027             | -.075             | .235              | -.117             | -.032             | -.061             |
|                           | PHM2 | .025              | -.022             | .041              | .000              | -.117             | .196              | -.128             | -.023             |
|                           | PHM3 | .006              | -.001             | -.051             | -.028             | -.032             | -.128             | .350              | .025              |
|                           | PPV1 | -.084             | .080              | -.108             | .016              | -.061             | -.023             | .025              | .410              |
|                           | PPV2 | -.048             | .070              | -.090             | -.028             | .012              | -.064             | .057              | -.114             |
|                           | PPV3 | .018              | -.124             | .103              | .019              | .024              | .061              | -.072             | -.113             |
|                           | PH1  | .061              | -.048             | -.030             | .016              | 6.388E-5          | -.008             | .039              | -.052             |
|                           | PH2  | -.026             | .032              | -.002             | .026              | .011              | -.023             | -.032             | .084              |
|                           | PH3  | -.076             | .045              | .044              | -.014             | -.014             | -.005             | -.045             | .003              |
| Anti-image<br>Correlation | PSI1 | .676 <sup>a</sup> | -.629             | -.087             | .102              | .087              | .083              | .015              | -.192             |
|                           | PSI2 | -.629             | .687 <sup>a</sup> | -.017             | -.294             | -.197             | -.086             | -.003             | .213              |
|                           | PSI3 | -.087             | -.017             | .835 <sup>a</sup> | -.181             | -.065             | .109              | -.103             | -.200             |
|                           | PSI4 | .102              | -.294             | -.181             | .886 <sup>a</sup> | -.206             | .001              | -.063             | .033              |
|                           | PHM1 | .087              | -.197             | -.065             | -.206             | .855 <sup>a</sup> | -.544             | -.110             | -.197             |
|                           | PHM2 | .083              | -.086             | .109              | .001              | -.544             | .799 <sup>a</sup> | -.489             | -.079             |
|                           | PHM3 | .015              | -.003             | -.103             | -.063             | -.110             | -.489             | .853 <sup>a</sup> | .067              |
|                           | PPV1 | -.192             | .213              | -.200             | .033              | -.197             | -.079             | .067              | .823 <sup>a</sup> |
|                           | PPV2 | -.118             | .200              | -.179             | -.062             | .043              | -.244             | .163              | -.299             |
|                           | PPV3 | .039              | -.317             | .184              | .038              | .074              | .208              | -.183             | -.265             |
|                           | PH1  | .151              | -.139             | -.060             | .036              | .000              | -.032             | .112              | -.139             |
|                           | PH2  | -.058             | .084              | -.003             | .053              | .035              | -.079             | -.083             | .202              |
|                           | PH3  | -.170             | .118              | .080              | -.028             | -.044             | -.019             | -.118             | .007              |

**Anti-image Matrices**

|                       |      | PPV2  | PPV3  | PH1      | PH2   | PH3   |
|-----------------------|------|-------|-------|----------|-------|-------|
| Anti-image Covariance | PSI1 | -.048 | .018  | .061     | -.026 | -.076 |
|                       | PSI2 | .070  | -.124 | -.048    | .032  | .045  |
|                       | PSI3 | -.090 | .103  | -.030    | -.002 | .044  |
|                       | PSI4 | -.028 | .019  | .016     | .026  | -.014 |
|                       | PHM1 | .012  | .024  | 6.388E-5 | .011  | -.014 |
|                       | PHM2 | -.064 | .061  | -.008    | -.023 | -.005 |
|                       | PHM3 | .057  | -.072 | .039     | -.032 | -.045 |
|                       | PPV1 | -.114 | -.113 | -.052    | .084  | .003  |



|                        |      |                   |                   |                   |                   |                   |
|------------------------|------|-------------------|-------------------|-------------------|-------------------|-------------------|
|                        | PPV2 | .352              | -.193             | -.052             | -.004             | .011              |
|                        | PPV3 | -.193             | .441              | .017              | -.012             | -.037             |
|                        | PH1  | -.052             | .017              | .343              | -.187             | -.152             |
|                        | PH2  | -.004             | -.012             | -.187             | .418              | -.109             |
|                        | PH3  | .011              | -.037             | -.152             | -.109             | .425              |
| Anti-image Correlation | PSI1 | -.118             | .039              | .151              | -.058             | -.170             |
|                        | PSI2 | .200              | -.317             | -.139             | .084              | .118              |
|                        | PSI3 | -.179             | .184              | -.060             | -.003             | .080              |
|                        | PSI4 | -.062             | .038              | .036              | .053              | -.028             |
|                        | PHM1 | .043              | .074              | .000              | .035              | -.044             |
|                        | PHM2 | -.244             | .208              | -.032             | -.079             | -.019             |
|                        | PHM3 | .163              | -.183             | .112              | -.083             | -.118             |
|                        | PPV1 | -.299             | -.265             | -.139             | .202              | .007              |
|                        | PPV2 | .788 <sup>a</sup> | -.490             | -.150             | -.011             | .028              |
|                        | PPV3 | -.490             | .721 <sup>a</sup> | .045              | -.028             | -.085             |
|                        | PH1  | -.150             | .045              | .785 <sup>a</sup> | -.494             | -.398             |
|                        | PH2  | -.011             | -.028             | -.494             | .778 <sup>a</sup> | -.258             |
|                        | PH3  | .028              | -.085             | -.398             | -.258             | .855 <sup>a</sup> |

a. Measures of Sampling Adequacy(MSA)

| Communalities |         |            |
|---------------|---------|------------|
|               | Initial | Extraction |
| PSI1          | 1.000   | .813       |
| PSI2          | 1.000   | .869       |
| PSI3          | 1.000   | .405       |
| PSI4          | 1.000   | .598       |
| PHM1          | 1.000   | .839       |
| PHM2          | 1.000   | .848       |
| PHM3          | 1.000   | .736       |
| PPV1          | 1.000   | .784       |
| PPV2          | 1.000   | .813       |
| PPV3          | 1.000   | .681       |
| PH1           | 1.000   | .797       |
| PH2           | 1.000   | .801       |
| PH3           | 1.000   | .763       |

Extraction Method: Principal  
Component Analysis.

**Total Variance Explained**

| Component | Initial Eigenvalues |               |              | Extraction Sums of Squared Loadings |               |              | Rotation Sums of Squared Loadings |
|-----------|---------------------|---------------|--------------|-------------------------------------|---------------|--------------|-----------------------------------|
|           |                     |               |              |                                     |               |              |                                   |
|           | Total               | % of Variance | Cumulative % | Total                               | % of Variance | Cumulative % | Total                             |
| 1         | 5.205               | 40.038        | 40.038       | 5.205                               | 40.038        | 40.038       | 3.080                             |
| 2         | 1.841               | 14.159        | 54.197       | 1.841                               | 14.159        | 54.197       | 2.509                             |
| 3         | 1.589               | 12.221        | 66.418       | 1.589                               | 12.221        | 66.418       | 2.425                             |
| 4         | 1.111               | 8.549         | 74.967       | 1.111                               | 8.549         | 74.967       | 1.732                             |
| 5         | .811                | 6.239         | 81.206       |                                     |               |              |                                   |
| 6         | .551                | 4.241         | 85.447       |                                     |               |              |                                   |
| 7         | .430                | 3.307         | 88.754       |                                     |               |              |                                   |
| 8         | .359                | 2.764         | 91.518       |                                     |               |              |                                   |
| 9         | .308                | 2.370         | 93.888       |                                     |               |              |                                   |
| 10        | .275                | 2.114         | 96.002       |                                     |               |              |                                   |
| 11        | .226                | 1.738         | 97.740       |                                     |               |              |                                   |
| 12        | .168                | 1.294         | 99.034       |                                     |               |              |                                   |
| 13        | .126                | .966          | 100.000      |                                     |               |              |                                   |

**Total Variance Explained**

| Component | Rotation Sums of Squared Loadings |              |
|-----------|-----------------------------------|--------------|
|           | % of Variance                     | Cumulative % |
| 1         | 23.688                            | 23.688       |
| 2         | 19.298                            | 42.987       |
| 3         | 18.657                            | 61.644       |
| 4         | 13.323                            | 74.967       |
| 5         |                                   |              |
| 6         |                                   |              |
| 7         |                                   |              |
| 8         |                                   |              |
| 9         |                                   |              |
| 10        |                                   |              |
| 11        |                                   |              |
| 12        |                                   |              |
| 13        |                                   |              |

Extraction Method: Principal Component Analysis.

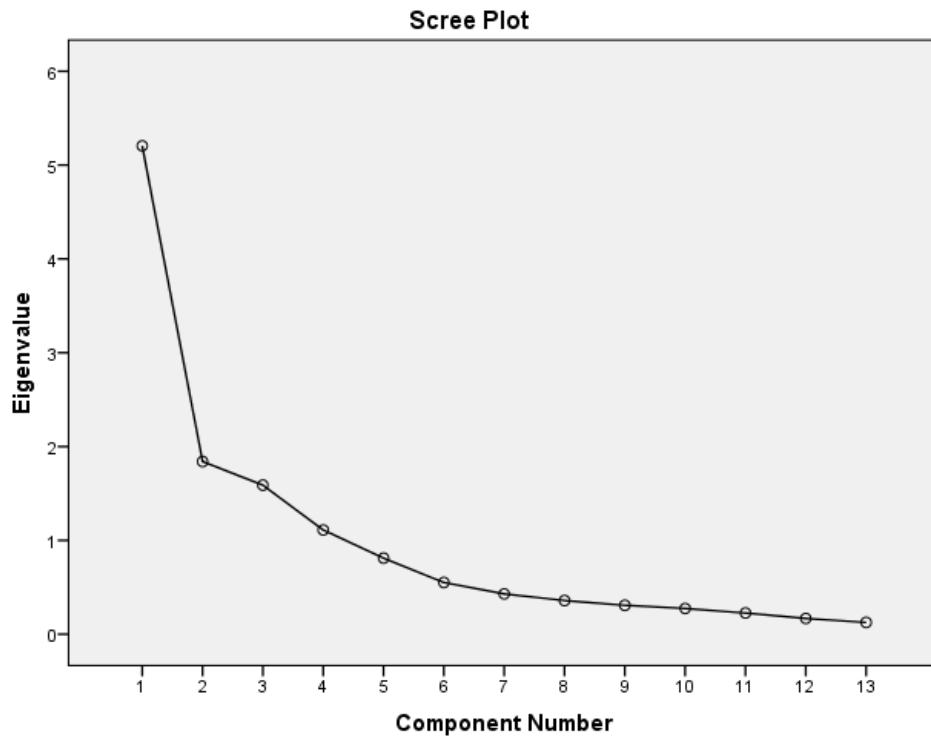

**Component Matrix<sup>a</sup>**

|      | Component |      |      |      |
|------|-----------|------|------|------|
|      | 1         | 2    | 3    | 4    |
| PHM2 | .800      |      |      |      |
| PHM1 | .793      |      |      |      |
| PHM3 | .710      |      |      |      |
| PPV2 | .679      |      | .509 |      |
| PPV1 | .659      |      |      |      |
| PH3  | .624      | .574 |      |      |
| PSI2 | .606      |      |      | .543 |
| PSI4 | .588      |      |      |      |
| PSI3 |           |      |      |      |
| PH2  |           | .701 |      |      |
| PH1  | .627      | .629 |      |      |
| PPV3 | .560      |      | .604 |      |
| PSI1 |           |      |      | .581 |

Extraction Method: Principal Component Analysis.<sup>a</sup>

a. 4 components extracted.

**Reproduced Correlations**

|                        |      | PSI1              | PSI2              | PSI3              | PSI4              | PHM1              | PHM2              | PHM3              | PPV1              |
|------------------------|------|-------------------|-------------------|-------------------|-------------------|-------------------|-------------------|-------------------|-------------------|
| Reproduced Correlation | PSI1 | .813 <sup>a</sup> | .760              | .195              | .348              | .236              | .164              | .164              | .290              |
|                        | PSI2 | .760              | .869 <sup>a</sup> | .246              | .564              | .494              | .418              | .427              | .226              |
|                        | PSI3 | .195              | .246              | .405 <sup>a</sup> | .349              | .437              | .412              | .340              | .511              |
|                        | PSI4 | .348              | .564              | .349              | .598 <sup>a</sup> | .653              | .606              | .582              | .288              |
|                        | PHM1 | .236              | .494              | .437              | .653              | .839 <sup>a</sup> | .833              | .773              | .428              |
|                        | PHM2 | .164              | .418              | .412              | .606              | .833              | .848 <sup>a</sup> | .782              | .420              |
|                        | PHM3 | .164              | .427              | .340              | .582              | .773              | .782              | .736 <sup>a</sup> | .305              |
|                        | PPV1 | .290              | .226              | .511              | .288              | .428              | .420              | .305              | .784 <sup>a</sup> |
|                        | PPV2 | .315              | .208              | .463              | .217              | .374              | .385              | .268              | .780              |
|                        | PPV3 | .518              | .363              | .344              | .173              | .214              | .195              | .117              | .627              |
|                        | PH1  | .163              | .142              | .127              | .099              | .342              | .430              | .363              | .342              |
|                        | PH2  | .082              | .096              | -.014             | .042              | .270              | .369              | .332              | .127              |
|                        | PH3  | .213              | .227              | .095              | .148              | .367              | .448              | .397              | .264              |
| Residual <sup>b</sup>  | PSI1 |                   | -.108             | .063              | -.089             | .010              | .034              | .024              | .042              |
|                        | PSI2 | -.108             |                   | .006              | -.047             | .003              | .002              | -.029             | .004              |
|                        | PSI3 | .063              | .006              |                   | .006              | -.088             | -.119             | -.075             | -.101             |
|                        | PSI4 | -.089             | -.047             | .006              |                   | -.081             | -.114             | -.128             | -.029             |
|                        | PHM1 | .010              | .003              | -.088             | -.081             |                   | .007              | -.069             | .020              |
|                        | PHM2 | .034              | .002              | -.119             | -.114             | .007              |                   | -.004             | .004              |
|                        | PHM3 | .024              | -.029             | -.075             | -.128             | -.069             | -.004             |                   | -.012             |
|                        | PPV1 | .042              | .004              | -.101             | -.029             | .020              | .004              | -.012             |                   |
|                        | PPV2 | -.004             | .009              | -.095             | .028              | -.004             | .031              | -.003             | -.101             |
|                        | PPV3 | -.141             | .008              | -.174             | .014              | .013              | .021              | .108              | -.086             |
|                        | PH1  | -.018             | .039              | .074              | .056              | -.006             | -.034             | -.069             | .001              |
|                        | PH2  | .010              | -.001             | .100              | .036              | -.019             | -.024             | -.022             | -.008             |
|                        | PH3  | .006              | -.035             | .035              | .031              | -.008             | -.030             | -.012             | .017              |

**Reproduced Correlations**

|                        |      | PPV2              | PPV3 | PH1  | PH2   | PH3  |
|------------------------|------|-------------------|------|------|-------|------|
| Reproduced Correlation | PSI1 | .315              | .518 | .163 | .082  | .213 |
|                        | PSI2 | .208              | .363 | .142 | .096  | .227 |
|                        | PSI3 | .463              | .344 | .127 | -.014 | .095 |
|                        | PSI4 | .217              | .173 | .099 | .042  | .148 |
|                        | PHM1 | .374              | .214 | .342 | .270  | .367 |
|                        | PHM2 | .385              | .195 | .430 | .369  | .448 |
|                        | PHM3 | .268              | .117 | .363 | .332  | .397 |
|                        | PPV1 | .780              | .627 | .342 | .127  | .264 |
|                        | PPV2 | .813 <sup>a</sup> | .674 | .467 | .260  | .383 |

|                       |      |       |                   |                   |                   |                   |
|-----------------------|------|-------|-------------------|-------------------|-------------------|-------------------|
|                       | PPV3 | .674  | .681 <sup>a</sup> | .360              | .184              | .310              |
|                       | PH1  | .467  | .360              | .797 <sup>a</sup> | .766              | .768              |
|                       | PH2  | .260  | .184              | .766              | .801 <sup>a</sup> | .762              |
|                       | PH3  | .383  | .310              | .768              | .762              | .763 <sup>a</sup> |
| Residual <sup>b</sup> | PSI1 | -.004 | -.141             | -.018             | .010              | .006              |
|                       | PSI2 | .009  | .008              | .039              | -.001             | -.035             |
|                       | PSI3 | -.095 | -.174             | .074              | .100              | .035              |
|                       | PSI4 | .028  | .014              | .056              | .036              | .031              |
|                       | PHM1 | -.004 | .013              | -.006             | -.019             | -.008             |
|                       | PHM2 | .031  | .021              | -.034             | -.024             | -.030             |
|                       | PHM3 | -.003 | .108              | -.069             | -.022             | -.012             |
|                       | PPV1 | -.101 | -.086             | .001              | -.008             | .017              |
|                       | PPV2 |       | -.032             | -.028             | .002              | -.030             |
|                       | PPV3 | -.032 |                   | -.067             | -.013             | -.022             |
|                       | PH1  | -.028 | -.067             |                   | -.058             | -.073             |
|                       | PH2  | .002  | -.013             | -.058             |                   | -.120             |
|                       | PH3  | -.030 | -.022             | -.073             | -.120             |                   |

Extraction Method: Principal Component Analysis.

a. Reproduced communalities

b. Residuals are computed between observed and reproduced correlations. There are 25 (32.0%) nonredundant residuals with absolute values greater than 0.05.

**Rotated Component Matrix<sup>a</sup>**

|      | Component |      |      |      |
|------|-----------|------|------|------|
|      | 1         | 2    | 3    | 4    |
| PHM1 | .860      |      |      |      |
| PHM2 | .845      |      |      |      |
| PHM3 | .809      |      |      |      |
| PSI4 | .692      |      |      |      |
| PH2  |           | .887 |      |      |
| PH1  |           | .840 |      |      |
| PH3  |           | .830 |      |      |
| PPV2 |           |      | .844 |      |
| PPV1 |           |      | .841 |      |
| PPV3 |           |      | .701 |      |
| PSI3 |           |      |      |      |
| PSI1 |           |      |      | .861 |
| PSI2 |           |      |      | .827 |

Extraction Method: Principal Component Analysis.

Rotation Method: Varimax with Kaiser

Normalization.<sup>a</sup>

a. Rotation converged in 6 iterations.

## Part SM4: Correlation Matrices for Continual Intention to Use

### Correlation Matrix for CI (Blogging)

|             |      | BCI1  | BCI2  |
|-------------|------|-------|-------|
| Correlation | BCI1 | 1.000 | 0.810 |
|             | BCI2 | 0.810 | 1.000 |

### Correlation Matrix for CI (Vlogging)

|             |      | VCI1  | VCI2  |
|-------------|------|-------|-------|
| Correlation | VCI1 | 1.000 | 0.835 |
|             | VCI2 | 0.835 | 1.000 |

### Correlation Matrix for CI (Pop-up store owning)

|             |      | PCI1  | PCI2  |
|-------------|------|-------|-------|
| Correlation | PCI1 | 1.000 | 0.790 |
|             | PCI2 | 0.790 | 1.000 |

## Part SM5: Multiple Regression (Blogging)

### Descriptive Statistics

|          | Mean   | Std. Deviation | N   |
|----------|--------|----------------|-----|
| BContInt | 3.9419 | .74117         | 129 |
| BHedMot  | 3.8501 | .69592         | 129 |
| BPriVal  | 3.7313 | .69856         | 129 |
| BHab     | 2.9767 | .91495         | 129 |
| BSocInf  | 3.3178 | .76133         | 129 |

### Correlations

|                     |          | BContInt | BHedMot | BPriVal | BHab  | BSocInf |
|---------------------|----------|----------|---------|---------|-------|---------|
| Pearson Correlation | BContInt | 1.000    | .591    | .304    | .587  | .192    |
|                     | BHedMot  | .591     | 1.000   | .250    | .465  | .277    |
|                     | BPriVal  | .304     | .250    | 1.000   | .328  | .274    |
|                     | BHab     | .587     | .465    | .328    | 1.000 | .361    |
|                     | BSocInf  | .192     | .277    | .274    | .361  | 1.000   |
| Sig. (1-tailed)     | BContInt | .        | .000    | .000    | .000  | .015    |
|                     | BHedMot  | .000     | .       | .002    | .000  | .001    |
|                     | BPriVal  | .000     | .002    | .       | .000  | .001    |
|                     | BHab     | .000     | .000    | .000    | .     | .000    |
|                     | BSocInf  | .015     | .001    | .001    | .000  | .       |
| N                   | BContInt | 129      | 129     | 129     | 129   | 129     |
|                     | BHedMot  | 129      | 129     | 129     | 129   | 129     |
|                     | BPriVal  | 129      | 129     | 129     | 129   | 129     |
|                     | BHab     | 129      | 129     | 129     | 129   | 129     |
|                     | BSocInf  | 129      | 129     | 129     | 129   | 129     |

### Variables Entered/Removed<sup>a</sup>

| Model | Variables Entered                            | Variables Removed | Method |
|-------|----------------------------------------------|-------------------|--------|
| 1     | BSocInf, BPriVal, BHedMot, BHab <sup>b</sup> | .                 | Enter  |

a. Dependent Variable: BContInt

b. All requested variables entered.



### Model Summary<sup>b</sup>

| Model | R                 | R Square | Adjusted R Square | Std. Error of the Estimate | Change Statistics |          |
|-------|-------------------|----------|-------------------|----------------------------|-------------------|----------|
|       |                   |          |                   |                            | R Square Change   | F Change |
| 1     | .698 <sup>a</sup> | .487     | .471              | .53931                     | .487              | 29.438   |

### Model Summary<sup>b</sup>

| Model | df1 | df2 | Sig. F Change | Durbin-Watson |
|-------|-----|-----|---------------|---------------|
|       |     |     |               |               |
| 1     | 4   | 124 | .000          | 1.770         |

a. Predictors: (Constant), BSocInf, BPriVal, BHedMot, BHab

b. Dependent Variable: BContInt

### ANOVA<sup>a</sup>

| Model |            | Sum of Squares | df  | Mean Square | F      | Sig.              |
|-------|------------|----------------|-----|-------------|--------|-------------------|
| 1     | Regression | 34.248         | 4   | 8.562       | 29.438 | .000 <sup>b</sup> |
|       | Residual   | 36.066         | 124 | .291        |        |                   |
|       | Total      | 70.314         | 128 |             |        |                   |

a. Dependent Variable: BContInt

b. Predictors: (Constant), BSocInf, BPriVal, BHedMot, BHab

### Coefficients<sup>a</sup>

| Model |            | Unstandardized Coefficients |            | Standardized Coefficients | t      | Sig. |
|-------|------------|-----------------------------|------------|---------------------------|--------|------|
|       |            | B                           | Std. Error | Beta                      |        |      |
| 1     | (Constant) | 1.224                       | .348       |                           | 3.521  | .001 |
|       | BHedMot    | .433                        | .078       | .407                      | 5.525  | .000 |
|       | BPriVal    | .102                        | .074       | .096                      | 1.381  | .170 |
|       | BHab       | .324                        | .062       | .400                      | 5.189  | .000 |
|       | BSocInf    | -.089                       | .069       | -.091                     | -1.293 | .198 |

## Part SM6: Multiple Regression (Vlogging)

### Descriptive Statistics

|          | Mean   | Std. Deviation | N   |
|----------|--------|----------------|-----|
| VContInt | 3.8185 | .71134         | 135 |
| VHedMot  | 3.9481 | .72146         | 135 |
| VHab     | 2.7605 | .94689         | 135 |
| VPriVal  | 3.5012 | .68613         | 135 |
| VSocInf  | 3.1685 | .64634         | 135 |

### Correlations

|                     |          | VContInt | VHedMot | VHab  | VPriVal | VSocInf |
|---------------------|----------|----------|---------|-------|---------|---------|
| Pearson Correlation | VContInt | 1.000    | .507    | .565  | .366    | .302    |
|                     | VHedMot  | .507     | 1.000   | .464  | .328    | .360    |
|                     | VHab     | .565     | .464    | 1.000 | .353    | .451    |
|                     | VPriVal  | .366     | .328    | .353  | 1.000   | .216    |
|                     | VSocInf  | .302     | .360    | .451  | .216    | 1.000   |
| Sig. (1-tailed)     | VContInt | .        | .000    | .000  | .000    | .000    |
|                     | VHedMot  | .000     | .       | .000  | .000    | .000    |
|                     | VHab     | .000     | .000    | .     | .000    | .000    |
|                     | VPriVal  | .000     | .000    | .000  | .       | .006    |
|                     | VSocInf  | .000     | .000    | .000  | .006    | .       |
| N                   | VContInt | 135      | 135     | 135   | 135     | 135     |
|                     | VHedMot  | 135      | 135     | 135   | 135     | 135     |
|                     | VHab     | 135      | 135     | 135   | 135     | 135     |
|                     | VPriVal  | 135      | 135     | 135   | 135     | 135     |
|                     | VSocInf  | 135      | 135     | 135   | 135     | 135     |

### Variables Entered/Removed<sup>a</sup>

| Model | Variables Entered                            | Variables Removed | Method |
|-------|----------------------------------------------|-------------------|--------|
| 1     | VSocInf, VPriVal, VHedMot, VHab <sup>b</sup> | .                 | Enter  |

a. Dependent Variable: VContInt

b. All requested variables entered.

### Model Summary<sup>b</sup>

| Model | R                 | R Square | Adjusted R Square | Std. Error of the Estimate | Change Statistics |          |
|-------|-------------------|----------|-------------------|----------------------------|-------------------|----------|
|       |                   |          |                   |                            | R Square Change   | F Change |
| 1     | .642 <sup>a</sup> | .412     | .393              | .55399                     | .412              | 22.732   |

### Model Summary<sup>b</sup>

| Model | df1 | df2 | Change Statistics |               |
|-------|-----|-----|-------------------|---------------|
|       |     |     | Sig. F Change     | Durbin-Watson |
| 1     | 4   | 130 | .000              | 2.078         |

a. Predictors: (Constant), VSocInf, VPriVal, VHedMot, VHab

b. Dependent Variable: VContInt

### ANOVA<sup>a</sup>

| Model |            | Sum of Squares | df  | Mean Square | F      | Sig.              |
|-------|------------|----------------|-----|-------------|--------|-------------------|
| 1     | Regression | 27.906         | 4   | 6.977       | 22.732 | .000 <sup>b</sup> |
|       | Residual   | 39.897         | 130 | .307        |        |                   |
|       | Total      | 67.804         | 134 |             |        |                   |

a. Dependent Variable: VContInt

b. Predictors: (Constant), VSocInf, VPriVal, VHedMot, VHab

### Coefficients<sup>a</sup>

| Model |            | Unstandardized Coefficients |            | Standardized Coefficients | t     | Sig. |
|-------|------------|-----------------------------|------------|---------------------------|-------|------|
|       |            | B                           | Std. Error | Beta                      |       |      |
| 1     | (Constant) | 1.424                       | .348       |                           | 4.092 | .000 |
|       | VHedMot    | .281                        | .078       | .285                      | 3.618 | .000 |
|       | VHab       | .290                        | .062       | .386                      | 4.659 | .000 |
|       | VPriVal    | .142                        | .076       | .137                      | 1.871 | .064 |
|       | VSocInf    | -.004                       | .085       | -.004                     | -.049 | .961 |

## Part SM7: Multiple Regression (Pop-Up Store)

### Descriptive Statistics

|            | Mean   | Std. Deviation | N  |
|------------|--------|----------------|----|
| PcontInt   | 3.4494 | .83613         | 89 |
| PHedMotSI4 | 3.4466 | .73321         | 89 |
| PHab       | 2.4195 | .87693         | 89 |
| PPriVal    | 3.4757 | .66835         | 89 |
| PSocInf    | 3.0225 | .79740         | 89 |

### Correlations

|                     |            | PcontInt | PHedMotSI4 | PHab  | PPriVal | PSocInf |
|---------------------|------------|----------|------------|-------|---------|---------|
| Pearson Correlation | PcontInt   | 1.000    | .556       | .525  | .494    | .283    |
|                     | PHedMotSI4 | .556     | 1.000      | .386  | .406    | .444    |
|                     | PHab       | .525     | .386       | 1.000 | .375    | .195    |
|                     | PPriVal    | .494     | .406       | .375  | 1.000   | .385    |
|                     | PSocInf    | .283     | .444       | .195  | .385    | 1.000   |
| Sig. (1-tailed)     | PcontInt   | .        | .000       | .000  | .000    | .004    |
|                     | PHedMotSI4 | .000     | .          | .000  | .000    | .000    |
|                     | PHab       | .000     | .000       | .     | .000    | .034    |
|                     | PPriVal    | .000     | .000       | .000  | .       | .000    |
|                     | PSocInf    | .004     | .000       | .034  | .000    | .       |
| N                   | PcontInt   | 89       | 89         | 89    | 89      | 89      |
|                     | PHedMotSI4 | 89       | 89         | 89    | 89      | 89      |
|                     | PHab       | 89       | 89         | 89    | 89      | 89      |
|                     | PPriVal    | 89       | 89         | 89    | 89      | 89      |
|                     | PSocInf    | 89       | 89         | 89    | 89      | 89      |

### Variables Entered/Removed<sup>a</sup>

| Model | Variables Entered                               | Variables Removed | Method |
|-------|-------------------------------------------------|-------------------|--------|
| 1     | PSocInf, PHab, PPriVal, PHedMotSI4 <sup>b</sup> | .                 | Enter  |

a. Dependent Variable: PcontInt

b. All requested variables entered.

### Model Summary<sup>b</sup>

| Model | R                 | R Square | Adjusted R Square | Std. Error of the Estimate | Change Statistics |          |
|-------|-------------------|----------|-------------------|----------------------------|-------------------|----------|
|       |                   |          |                   |                            | R Square Change   | F Change |
| 1     | .685 <sup>a</sup> | .469     | .444              | .62361                     | .469              | 18.551   |

### Model Summary<sup>b</sup>

| Model | df1 | df2 | Change Statistics |               |
|-------|-----|-----|-------------------|---------------|
|       |     |     | Sig. F Change     | Durbin-Watson |
| 1     | 4   | 84  | .000              | 2.095         |

a. Predictors: (Constant), PSocInf, PHab, PPriVal, PHedMotSI4

b. Dependent Variable: PcontInt

### ANOVA<sup>a</sup>

| Model |            | Sum of Squares | df | Mean Square | F      | Sig.              |
|-------|------------|----------------|----|-------------|--------|-------------------|
| 1     | Regression | 28.856         | 4  | 7.214       | 18.551 | .000 <sup>b</sup> |
|       | Residual   | 32.666         | 84 | .389        |        |                   |
|       | Total      | 61.522         | 88 |             |        |                   |

a. Dependent Variable: PcontInt

b. Predictors: (Constant), PSocInf, PHab, PPriVal, PHedMotSI4

### Coefficients<sup>a</sup>

| Model |            | Unstandardized Coefficients |            | Standardized Coefficients | t     | Sig. |
|-------|------------|-----------------------------|------------|---------------------------|-------|------|
|       |            | B                           | Std. Error | Beta                      |       |      |
| 1     | (Constant) | .378                        | .405       |                           | .933  | .353 |
|       | PHedMotSI4 | .400                        | .110       | .351                      | 3.649 | .000 |
|       | PHab       | .288                        | .085       | .302                      | 3.379 | .001 |
|       | PPriVal    | .312                        | .116       | .249                      | 2.678 | .009 |
|       | PSocInf    | -.029                       | .096       | -.028                     | -.302 | .763 |
